# Supplementary material
Source: PubMed Central journal article supplement (PMC9419662)
Supplement: mmc1.pdf [file mmc1.pdf]

# INDIVIDUAL CONFLICT OF INTEREST STATEMENT

## *American Association of Hip and Knee Surgeons*

(Adopted from the American Academy of Orthopaedic Surgeons disclosure statement)

The following form **must be filled out completely and submitted by each author (example, 6 authors, 6 forms).** **All items require a response. If there is no relevant disclosure for a given item, enter "None."**

### **The Changing Economic Value and Leverage of Arthroplasty Surgeons**

## **Introduction: We've got a problem.....**

---

#### **Manuscript Title**

1. Royalties from a company or supplier (The following conflicts were disclosed)

none

2. Speakers bureau/paid presentations for a company or supplier (The following conflicts were disclosed)

none

3A. Paid employee for a company or supplier (The following conflicts were disclosed)

none

3B. Paid consultant for a company or supplier (The following conflicts were disclosed)

Aesculap, DePuy

3C. Unpaid consultants for a company or supplier (The following conflicts were disclosed)

4. Stock or stock options in a company or supplier (The following conflicts were disclosed)

MedTel, Force, Covina, Wellbe

5. Research support from a company or supplier as a Principal Investigator (The following conflicts were disclosed)

6. Other financial or material support from a company or supplier (The following conflicts were disclosed)

7. Royalties, financial or material support from publishers (The following conflicts were disclosed)

8. Medical/Orthopaedic publications editorial/governing board (The following conflicts were disclosed)

CORR, JBJS Reviews, JBJS, JAAOS, JOA

9. Board member/committee appointments for a society (The following conflicts were disclosed)

AAHKS, HS Research Committee

**Each author must sign AND print or type his/her name, date and submit a separate form**

In addition, one BLINDED Conflict of Interest form (no author names used) should be submitted per manuscript with all author disclosures.

Richard Iorio

A handwritten signature in black ink that reads "Richard Iorio". The letters are cursive and somewhat stylized, with the 'e' in "Iorio" being particularly prominent.

11-3-21

---

Author Name (Print or Type)

Author Signature

Date
